# Supplementary material for: Acceptability and Implementation Considerations for Community Pharmacy–Based Delivery of Pre-Exposure Prophylaxis and Antiretroviral Therapy in Dar es Salaam: A Sequential Explanatory Mixed-Methods Design
Source: Research Square preprint supplement (doi:10.21203/rs.3.rs-9530938/v1), 2026-05-12
Supplement: Supplementary file 1 [file 70be5e894d0f049675873d6c.docx]

**Supplementary file 2: Sociodemographic characteristics of all qualitative study participants.**

1. **Women engaged in transactional sex (in-depth interviews)**

| Participant ID | Age (years) | Marital status | Highest education level | Main source of income | Duration in transactional sex (years) | Sex work operational environments | Number of children | Do you use Preexposure prophylaxis (PrEP) | Usual first point of contact for healthcare |
| --- | --- | --- | --- | --- | --- | --- | --- | --- | --- |
| IDI01 | 27 | Not married | Secondary | Transactional sex | 1 | Hotel | 0 | Never used PrEP | Community pharmacy |
| IDI02 | 24 | Not married | Secondary | Transactional sex | 2 | Brothel and hotel | 0 | Never used PrEP | Community pharmacy |
| IDI03 | 34 | Not married | Secondary | Transactional sex | 1 | Spa (massage and wellness facility) | 1 | Yes | Health facility |
| IDI04 | 23 | Not married | Primary | Transactional sex | 1 | Online platforms | 1 | Never used PrEP | Community pharmacy |
| IDI05 | 22 | Not married | Advanced secondary | Transactional sex | 5 | Night club and hotel | 1 | Yes | Health facility |
| IDI06 | 30 | Not married | Secondary | Transactional sex | 7 months | Lodge | 1 | Never used PrEP | Community pharmacy |
| IDI07 | 27 | Not married | Diploma | Transactional sex | 4 | Hotel | 0 | Yes | Community pharmacy |

1. **People living with HIV (focused group discussions)**

| Participant ID | Age (years) | Sex | Employment status | Time on antiretroviral therapy (ART) | Nearest clinic refill | Time to reach clinic | Nearest pharmacy | First point of medical contact | Children |
| --- | --- | --- | --- | --- | --- | --- | --- | --- | --- |
| FGD08 | 25 | Female | Entrepreneur | 9 months | Yes | 30 min | Community pharmacy | Hospital | Yes |
| FGD09 | 29 | Female | Not employed | 10 years | Yes | 3 min | Health facility | Health facility | Yes |
| FGD10 | 52 | Female | Community health worker | 8 years | Yes | 2 hrs | — | Community pharmacy | Yes |
| FGD11 | 40 | Female | Business | 6 years | Yes | 25 min | Health facility | Health facility | No |
| FGD12 | 31 | Male | Employed | 4 years | Yes | 15 min | Hospital | Hospital | Yes |
| FGD13 | 35 | Female | Self-employed | 3 years | Yes | 20 min | Community pharmacy | Community pharmacy | Yes |
| FGD14 | 28 | Female | Entrepreneur | 2 years | Yes | 10 min | Health facility | Health facility | No |
| FGD15 | 45 | Female | Not employed | 11 years | Yes | 35 min | Hospital | Health facility | Yes |
| FGD16 | 38 | Male | Business | 5 years | Yes | 18 min | Community pharmacy | Community pharmacy | Yes |
| FGD17 | 33 | Female | Self-employed | 6 years | Yes | 12 min | Hospital | Hospital | Yes |
| FGD18 | 41 | Female | Employed | 7 years | Yes | 40 min | Health facility | Health facility | Yes |
| FGD19 | 36 | Female | Entrepreneur | 4 years | Yes | 22 min | Community pharmacy | Community pharmacy | No |

1. **Pharmacists & health-system stakeholders (in-depth interviews)**

| Participant ID | Age (years) | Sex | Position | Years experience | HIV service involvement | Relationship with pharmacies |
| --- | --- | --- | --- | --- | --- | --- |
| IDI08 | 28 | Male | Branch Manager | 3 years | Indirect | Health worker |
| IDI09 | 36 | Female | Pharmacist & Coordinator | 9 years | Direct | Board member |
| IDI10 | 30 | Male | Owner | 5 years | Indirect | Owner |
| IDI11 | 31 | Male | Pharmacist | 8 years | Indirect | Owner |
| IDI12 | 32 | Male | Owner | 6 years | Indirect | Owner & HW |
| IDI13 | 30 | Female | Pharmacist | 6 years | Indirect | Health worker |
| IDI14 | 37 | Male | Owner | 11 years | Direct | Owner |

1. **Key informants / policymakers (key informant interviews)**

| Participant ID | Age (years) | Sex | Education | Years experience |
| --- | --- | --- | --- | --- |
| KII01 | 45 | Male | MSc | 3 years |
| KII02 | 43 | Female | MSc | 11 years |
