# Supplementary material for: Acceptability and Implementation Considerations for Community Pharmacy–Based Delivery of Pre-Exposure Prophylaxis and Antiretroviral Therapy in Dar es Salaam: A Sequential Explanatory Mixed-Methods Design
Source: Research Square preprint supplement (doi:10.21203/rs.3.rs-9530938/v1), 2026-05-12
Supplement: Supplementary file 2 [file 952e500a4322b834e8b6878a.docx]

**Supplementary file 1.** Questionnaires used in data collection

Data Collection Tool 1: For Female at High Risk of Acquiring HIV (Female Sex Workers):

**Section 1: Socio-demographic & Work-related Characteristics**

- Age (years): …………………
- Duration in sex work (years): …………………
- At what age did you first start sex work? …………………
- Primary location of work:
  ☐ Street-based ☐ Brothel ☐ Bar/club ☐ Hotel/lodge ☐ Other (Specify: ________)
- Marital status:
  ☐ Single ☐ Married ☐ Divorced/Separated ☐ Widowed
- Do you have children?
  ☐ Yes ☐ No
- Employment status:
  ☐ Employed ☐ Not employed ☐ Self-employed
- Other sources of income besides sex work?
  ☐ Yes ☐ No (If yes, specify: ________)
- On average how many clients do you typically see in a day? …………………
- Do you have regular clients?
  ☐ Yes ☐ No
- Highest level of education completed:
  ☐ No formal education ☐ Primary ☐ Secondary ☐ Diploma ☐ Degree or higher

**Section 2: HIV Risk & Prevention Behaviors**

- Do you consistently use condoms with clients?
  ☐ Always ☐ Often ☐ Sometimes ☐ Rarely ☐ Never
- Have you ever experienced violence or coercion in your work?
  ☐ Yes ☐ No (If yes, specify type: ________)
- Have you ever tested for HIV?
  ☐ Yes ☐ No
- If yes, when was your last HIV test? (months) …………………
- Do you currently know your HIV status?
  ☐ Positive ☐ Negative ☐ Don’t know

**Section 3: Awareness and Perceptions of PrEP**

- Have you ever heard about PrEP before this interview?
  ☐ Yes ☐ No
- Where did you first hear about PrEP?
  ☐ Health worker ☐ Peer ☐ Community organization ☐ Media ☐ Other (Specify: ________)
- How confident do you feel about understanding how PrEP works?
  ☐ Very confident ☐ Confident ☐ Neutral ☐ Not very confident ☐ Not at all confident

**Section 4: PrEP and ART Access Preferences**

- Would you feel comfortable obtaining PrEP at a pharmacy rather than a hospital?
  ☐ Strongly agree ☐ Agree ☐ Neutral ☐ Disagree ☐ Strongly disagree
- What would make it easier for you to access PrEP at a pharmacy? (Select all that apply)
  ☐ More privacy ☐ Flexible hours ☐ Shorter wait times ☐ Friendly staff ☐ Convenient location ☐ Other (Specify: ________)
- What concerns would you have about accessing PrEP at a pharmacy? (Select all that apply)
  ☐ Fear of being judged ☐ Not trusting the pharmacist ☐ Medication quality ☐ Stockouts ☐ High cost ☐ Other (Specify: ________)
- Which type of health facility would you feel most comfortable obtaining PrEP from?
  ☐ Pharmacy ☐ Public hospital ☐ Private hospital/clinic ☐ Community health center ☐ Mobile clinic ☐ Other (Specify: ________)
- Would you prefer PrEP services provided by:
  ☐ Male health worker ☐ Female health worker ☐ No preference
- How often would you prefer to collect PrEP medication?
  ☐ Monthly ☐ Every 2–3 months ☐ Every 6 months
- Would you be interested in long-acting injectable PrEP if available?
  ☐ Yes ☐ No ☐ Not sure

**Section 5: Stigma, Support, and Confidentiality**

- Do you fear stigma or discrimination if people knew you were taking PrEP?
  ☐ Yes ☐ No
- Do your peers/colleagues in sex work support the idea of using PrEP?
  ☐ Yes ☐ No ☐ Not sure
- Would you prefer counseling/support services alongside PrEP provision?
  ☐ Yes ☐ No

Data Collection Tool 2: For People Living with HIV (PLHIV):

## Section 1: Socio-demographic Characteristics

- Sex:
  ☐ Male ☐ Female
- Age (years): ……………………
- Time since HIV diagnosis (years): ……………………
- Time since using antiretroviral therapy (ART) (years): ……………………
- Marital status:
  ☐ Single ☐ Married ☐ Divorced/Separated ☐ Widowed
- Do you have children?
  ☐ Yes ☐ No
- Employment status:
  ☐ Employed ☐ Not employed ☐ Self-employed
- Highest level of education completed:
  ☐ No formal education ☐ Primary ☐ Secondary ☐ Diploma ☐ Degree or higher
- Current anti-HIV (ARVs) refill location:
  ☐ Public hospital ☐ Private clinic ☐ Other (Specify: ______)
- Time spent to reach the nearest ARV refill clinic (minutes): ……………………
- Time spent at the clinic for ARV refill (minutes): ……………………
- Who usually reminds or supports you in taking your medication?
  ☐ Self ☐ Partner ☐ Family ☐ Peer/Support group ☐ No one

## **Section 2: ART Access Challenges**

- Have you ever missed an ART refill because of clinic-related challenges?
  ☐ Yes ☐ No
  (If yes, specify: ________)
- What were the main challenges in accessing ART at the clinic? (Select all that apply)
  ☐ Long waiting times
  ☐ Distance/transport cost
  ☐ Limited opening hours
  ☐ Stigma at facility
  ☐ Unfriendly staff
  ☐ Other (Specify: ________)

## **Section 3: ART Provision at Community Pharmacies**

### **A. Awareness & Experience**

- Have you ever heard of ART being provided through community pharmacies?
  ☐ Yes ☐ No
- Have you personally ever received ART from a pharmacy?
  ☐ Yes ☐ No
  (If yes, how was your experience? ________)

### **B. Perceived Benefits**

- What benefits would you see in getting ART from a community pharmacy? (Select all that apply)
  ☐ More privacy/confidentiality
  ☐ Closer to home
  ☐ Shorter waiting time
  ☐ More flexible/longer opening hours
  ☐ Reduced transport costs
  ☐ Easier to combine with other medications (one-stop service)
  ☐ Friendly staff
  ☐ Other (Specify: ________)

### **C. Concerns/Barriers**

- What concerns would you have about getting ART from a pharmacy? (Select all that apply)
  ☐ Fear of stigma or being recognized
  ☐ Higher costs (consultation or drugs)
  ☐ Stockouts/unreliable supply
  ☐ Concerns about drug quality
  ☐ Pharmacist may not be well-trained in HIV care
  ☐ Confidentiality not guaranteed
  ☐ Poor record-keeping/treatment interruptions
  ☐ Other (Specify: ________)

### **D. Preferences**

- Who would you prefer to provide ART refills at a pharmacy?
  ☐ Pharmacist only ☐ Trained nurse in pharmacy ☐ Either/no preference
- Would you prefer a male or female pharmacy provider?
  ☐ Male ☐ Female ☐ No preference
- How frequently would you prefer to collect ART at a pharmacy?
  ☐ Monthly ☐ Every 2–3 months ☐ Every 6 months
- Would you be open to long-acting injectable ART if available?
  ☐ Yes ☐ No ☐ Not sure
- Would you like additional services available at the pharmacy? (Select all that apply)
  ☐ HIV testing & counseling
  ☐ Adherence counseling/support
  ☐ Sexual & reproductive health services
  ☐ STI screening
  ☐ General health checks (e.g., BP, diabetes)
  ☐ Other (Specify: ________)

### **E. Feasibility & Willingness**

- Would you be willing to transfer your ART refills from a clinic to a pharmacy if given the option?
  ☐ Yes ☐ No ☐ Not sure
- What conditions would make you more willing to use pharmacy-based ART services? (Select all that apply)
  ☐ Lower/no additional cost
  ☐ Guaranteed privacy
  ☐ Well-trained staff
  ☐ Regular/consistent drug supply
  ☐ Integration with clinic medical records
  ☐ Other (Specify: ________)

**Data Collection Tool 3: For Pharmacy Owners/ Dispensers:**

## Section 1: Socio-demographic Characteristics

- Are you the pharmacy owner or dispenser?

☐ Owner ☐ Dispenser ☐ Owner and Dispenser

- Your professional category (for dispensers only)

☐ Pharmacy ☐ Clinician ☐ Nurse ☐ Other (Specify: ______)

- If your response above was pharmacy category, which category?

☐ Pharmacist ☐ Pharmaceutical-technician ☐ Pharmaceutical-assistant ☐ Other (Specify: ______)

- Age (year)…………………….
- **Sex:**
  ☐ Male ☐ Female
- **Marital status:**
  ☐ Single ☐ Married ☐ Divorced/Separated ☐ Widowed
- **Highest level of education completed:**
  ☐ No formal education ☐ Primary ☐ Secondary
  ☐ Certificate ☐ Diploma ☐ Bachelor's ☐ Master's ☐ Doctorate
- **Years of experience in owning or managing a pharmacy (year)………….**
- **Average number of clients served per day at your pharmacy location**………
- **Do you currently offer any HIV-related services (e.g., HIV testing, PrEP, ART refills)?**
  ☐ Yes ☐ No
  **If yes, please specify which services: ________**
- **Do you have any staff trained in HIV service delivery (e.g., adherence counseling, ARVs dispensing)?**
  ☐ Yes ☐ No ☐ Not sure
- **Have you ever been approached by clients asking about PrEP or ART refills?**
  ☐ Yes ☐ No
- **Would you feel comfortable offering PrEP services at your pharmacy?**
  ☐ Strongly agree ☐ Agree ☐ Neutral ☐ Disagree ☐ Strongly disagree
- **Would you feel comfortable offering ART refills at your pharmacy?**
  ☐ Strongly agree ☐ Agree ☐ Neutral ☐ Disagree ☐ Strongly disagree
- **What would make it easier for you to provide PrEP or ART services at your pharmacy?** (Select all that apply)
  ☐ Training for pharmacy staff
  ☐ Clear government policy/support
  ☐ Access to PrEP/ART supply chain
  ☐ Access to digital tools (e.g., record systems, drug interaction apps)
  ☐ Collaboration with health facilities
  ☐ Community sensitization
  ☐ Other (Specify: ______)
- **What concerns do you have about offering PrEP or ART at your pharmacy?** (Select all that apply)
  ☐ Lack of staff capacity
  ☐ Legal or regulatory uncertainty
  ☐ Cost of implementation
  ☐ Community stigma or judgment
  ☐ Risk of drug stockouts
  ☐ Quality assurance or follow-up challenges
  ☐ Other (Specify: ______)
- **What benefits do you see in providing PrEP and ART from a pharmacy setting?** (Select all that apply)
  ☐ Improved community access
  ☐ Reduced burden on clinics
  ☐ Increased pharmacy visibility
  ☐ Business growth
  ☐ Greater trust and continuity for clients
  ☐ Other (Specify: ______)

## Section 2: Service Delivery Context

- What challenges do you foresee in delivering PrEP and ART at pharmacies? (For pharmacists and healthcare providers only)
  ☐ Lack of training ☐ Limited time ☐ Policy restrictions ☐ Drug supply challenges ☐ Client stigma, ☐ Lack of computers or digital infrastructure (e.g., record-keeping systems, drug interaction apps) ☐ Other (Specify: ______)
- What would support your ability to provide PrEP and ART services? (Select all that apply)
  ☐ Government policy ☐ Training ☐ Financial support ☐ Technical guidelines, ☐ Access to digital tools (e.g., computers, record-keeping software, drug interaction apps), ☐ Linkage to clinics ☐ Other (Specify: ______)

## Section 3: Policy and Regulatory Environment

- What legal or policy barriers exist for pharmacy-based HIV care? (Select all that apply)
  ☐ Licensing limitations ☐ Lack of training certification ☐ Lack of monitoring systems ☐ Other (Specify: ______)
- Should national policies explicitly support pharmacy-based HIV service delivery?
  ☐ Yes ☐ No ☐ Not sure

## Section 4: Pharmacy Capacity

- Which service do you most prefer to be offered at the pharmacy facility

☐ PrEP only ☐ ARVs refill only ☐ Both ARVs and PrEP refill ☐ None

- Have you been trained to provide PrEP or ART adherence support?
  ☐ Yes ☐ No
- Are you open to receiving additional training in HIV service provision?
  ☐ Yes ☐ No ☐ Only if required by law
- Do you feel confident advising clients on ART adherence and PrEP use?
  ☐ Yes ☐ No ☐ Somewhat

## Section 5: Implementation Feasibility

- Do you think PrEP and ART services in pharmacies would need ongoing supervision or evaluation?
  ☐ Yes ☐ No ☐ Not sure
- Are pharmacy-based PrEP and ART services a sustainable option for long-term HIV care?
  ☐ Yes, both ☐ Only PrEP ☐ Only ART ☐ Neither
- What are the potential barriers to scaling pharmacy-based HIV services? (Select all that apply)
  ☐ Inadequate pharmacist training ☐ Weak supply chain ☐ Client preferences for clinics ☐ Regulatory issues ☐ Funding limitations ☐ Other (Specify: ______)
- What are the greatest infrastructure-related challenges to offering HIV services in your pharmacy? (Select all that apply)
  ☐ Lack of digital tools
  ☐ Inadequate private space
  ☐ Unstable electricity/internet
  ☐ Limited funding for equipment
  ☐ Absence of infrastructure standards or guidance
  ☐ Other (Specify: ______)
- How likely are you to recommend pharmacy-based PrEP or ART services to others in your community?
  ☐ Very likely ☐ Likely ☐ Neutral ☐ Unlikely ☐ Very unlikely
- **Do you believe clients would prefer accessing PrEP or ART from a pharmacy instead of a clinic?**
  ☐ Strongly agree ☐ Agree ☐ Neutral ☐ Disagree ☐ Strongly disagree
